# Supplementary material for: Improving Cl determination in cements by molecular LIBS using noble gas-enriched atmospheres and new approaches for interference removal
Source: Royal Society of Chemistry journal article supplement (doi:10.1039/d2ja00343k), 2022-12-12
Supplement: d2ja00343k1.pdf [file d2ja00343k1.pdf]

### Supplementary Material

Pseudo Voigt fitting model.- Equation 1 explicitly shows all parameters involved;  $\eta$  establishes the ratio between the Gaussian (left hand summand) and the Lorentzian (right hand summand) contributions to the profile ( $0 < \eta < 1$ ),  $\lambda_0$  is the central wavelength of the line, and  $\Delta\lambda_G$  and  $\Delta\lambda_L$  are the full widths at half maximum (FWHM) of the Gaussian and the Lorentzian contributions, respectively. Since the pseudo-Voigt profile area is normalized to 1 [1], and the studied profiles did not fulfill this condition, a scale factor  $K$  accounting for the line intensity was added to the fitting model.

$$I(\lambda) = \left( \frac{2\sqrt{\ln 2}(1-\eta)}{\sqrt{\pi}\Delta\lambda_G} e^{-\ln 2 \left(\frac{\lambda-\lambda_0}{\Delta\lambda_G}\right)^2} + \frac{\eta\Delta\lambda_L}{2\pi \left[ (\lambda-\lambda_0)^2 + \left(\frac{\Delta\lambda_L}{2}\right)^2 \right]} \right) K$$

Equation 1

### Bibliography

- [1] M. Schmid, H. P. Steinrück, and J. M. Gottfried, "A new asymmetric Pseudo-Voigt function for more efficient fitting of XPS lines," *Surf. Interface Anal.*, vol. 46, no. 8, pp. 505–511, 2014.
